# Supplementary material
Source: publisher figshare collection journal article supplement (https://gsajournals.figshare.com/ndownloader/files/26610287)
Supplement: Supplementary file 1 [file 26610287]

## Sheet: Legend
Dataset S6 (separate file). Expression and Methylation Profiles of Symbiotic and Developmental Genes of Interest (.xlsx workbook). Genes identified previously to be important for symbiotic metabolism (sheet 1; Kim et al., 2018) or developmental processes (sheet 2; Shigenobu et al., 2010) are compared to expression and methylation data from this study. Each row represents a different gene of inter…

## Sheet: Symb. DEGs and and DMGs
			KEY:		MIN	Median	MAX			downregulated	up-regulated			downregulated		up-regulated				downregulated		up-regulated				hypomethylated		hypermethylated			hypomethylated		hypermethylated
	(*) = LOC is listed under two or more Metabolic Function Categories
				Average Normalized Expression					Diff. Exp. (log2FoldChange)					Diff. Exp. (log2FoldChange)						Diff. Splice						Diff. Meth. (% diff. Meth)					Diff. Meth. (% diff. Meth)						G3 BAC vs. BODY*			*Blue (+) up in BAC, Red (-) down in BAC
	Gene ID	Annotation	EC numbers	1st instar	2nd instar	3rd instar	4th instar	YA	1st vs. 2nd	2nd vs. 3rd	3rd vs. 4th	4th vs. YA		1st	2nd	3rd	4th	YA		1st vs. 2nd	2nd vs. 3rd	3rd vs. 4th	4th vs. YA	X vs. REST		1st vs. 2nd	2nd vs. 3rd	3rd vs. 4th	4th vs. YA		1st	2nd	3rd	4th	YA		sig. DE (log2FC)	Diff. spliced	Diff.meth
	Transporters
	LOC100159667	ApGLNT1	N/A	7814.81	6511.21	4957.26	1992.05	3629.72			-1.90772															-37.2253	34.898		28.5714			32.0835			-25.1668		1.52774	X	X
	LOC100168251	ApNEAAT1, proton-coupled amino acid transporter 4-like	N/A	8746.5	11289.3	13016.7	5123.37	7063.06			-1.94962																										-	-	-
	LOC100159441	Trehalose transporter Tret1	N/A	3513.78	2956.65	1891.99	903.823	1817.77			-1.54847																				31.8898						1.53162	X
	LOC100161392	Slc16a10; MCT-Organic acid transporters;monocarboxylic acid transporters	N/A	14635	11937.6	9262.56	9507.95	6923.95																1st: -4.279554817					34.8276								4.45708
	LOC100161575	MCT- uncharacterized protein	N/A	5686.29	5290.92	3328.12	2549.28	2287.48																							40.3774			-27.5018	-29.5512		3.35106	X
	LOC100159134	MCT, pyruvate cytoplasm transporter	N/A	2300.25	2484.95	1174.29	365.17	1499.67			-2.44435																										1.37042	X
	LOC100570364	MCT, pyruvate cytoplasm transporter	N/A	715.797	614.77	308.734	265.31	453.034																														X
	LOC100162256	MCT, pyruvate cytoplasm transporter	N/A	11019.2	10058.5	10011.3	4776.22	7305.04			-1.54945													4th: 6.010499549							33.70098039 & 42.71834835							X	X
	LOC100168581	MCT, pyruvate cytoplasm transporter	N/A	209.787	131.078	110.695	78.4195	213.759																				27.0833									-2.6885	X
	LOC100163886	MCT, pyruvate cytoplasm transporter	N/A	3219.59	3410.32	2301.34	1250.88	1629.01																													1.50286	X
	LOC100167201	MPC, pyruvate mitochodria transporter	N/A	1818.14	1656.66	1040.41	1142.09	898.924																													1.45491
	Starch and Sucrose metabolism
	LOC100162689	Trehalase-like isoform X1 (trehalose -> D-glucose)	3.2.1.28	1095.32	870.877	553.082	346.889	437.916																													1.18817	X
	Serine/Glycine metabolism
	LOC100161178	L-threonine aldolase 2*	4.1.2.48	5160.79	2858.61	2086.6	1361.5	1509.86	-1.27447					-2.02269																								X
	Serine biosynthesis
	LOC100165735	Phosphoglycerate dehydrogenase; Phgdp*	1.1.1.95; 1.1.1.399	32790.3	30058.6	21647.4	19297.7	14569.7																													3.06846
	LOC100158884	Phosphoserine phosphatase; PSPH*	3.1.3.3	7319.65	6253.99	4381.44	2870.38	2634.51																													4.54845	X
	One carbon pool by folate
	LOC100159628	SHMT1; serine hydroxymethyltransferase	2.1.2.1	11952.5	11863.7	10800.5	11400	7713.96																				-33.6113	37.3864					32.7661			2.90376	X
	LOC100168194	Bifunctional purine biosynthesis protein PURH	2.1.2.3; 3.5.4.10	10502.9	11190.7	9767.86	7034.04	5814.34																													2.68206		X
	LOC100164363	Bifunctional methylenetetrahydrofolate dehydrogenase/cyclohydrolase, mitochondrial	3.5.4.9; 1.5.1.15	1366.69	1420.12	1429.69	1498.47	1213.54																													-0.948426	X
	LOC100167020	C-1-tetrahydrofolate synthase, cytoplasmic	3.5.4.9; 1.5.1.5; 6.3.4.3	9893.83	10814.7	7299.71	5039.07	3663.02															-19.553								27.1242						1.83234	X	X
	LOC100161593	DHFR; dihydrofolate reductase	1.5.1.3	1193.62	1522.51	1284.93	1822.61	1370.42																													1.7367
	LOC100161199	Gamma-glutamyl hydrolase A-like	3.4.19.9	497.477	327.819	219.174	140.179	75.8512																													-3.62992	X
	LOC100167343	Gamma-glutamyl hydrolase-like	3.4.19.9	3593.25	3284.37	1851.47	1797.64	1135.65																														X
	LOC100571243	Gamma-glutamyl hydrolase A-like	3.4.19.9	#N/A																																	7.23775
	Glycine cleavage system
	LOC100161583	Aminomethyltransferase, mitochondrial	2.1.2.10	8203.58	6938.44	4097.06	1501.83	2459.59			-2.10251
	LOC100162429	Dihydrolipoyl dehydrogenase, mitochondrial*	1.8.1.4	17452	15923.8	13366.6	13235	9769.7																													0.680531
	LOC100164013	Glycine dehydrogenase (decarboxylating), mitochondrial*	1.4.4.2	19539	15807	9173.72	5870.53	5335.38																													4.33865	X
	LOC100169052	Glycine cleavage system h protein-like (GCSH)	N/A	5615.13	5858.97	3583.15	4207.68	3253.01																													4.05533
	Pyruvate metabolism
	PEP/ Asp biosynthesis (in mitochondria)
	LOC100162105	Pyruvate carboxylase, mitochondrial	6.4.1.1	33126.3	27065.8	16263.4	9850.4	8119.63			-1.05527																48.8462	-37.5774									1.30413		X
	LOC100160700	Phosphoenolpyruvate carboxykinase [GTP]-like*	4.1.1.32	7614.29	6412.58	4527.59	1429.41	13089			-2.41043	4.67426																									3.64071	X
	LOC100163785	Acetyl coenzyme A synthase; Accoas	6.2.1.1	7090.31	3708.09	1906.59	1334.31	1183.06	-1.39184																												-3.2392
	Ala conversion (in mitochondria)
	LOC100163196	Alanine--glyoxylate aminotransferase 2, mitochondrial*	2.6.1.44; 2.6.1.40	2598.93	1738.33	1056.38	524.955	465.762																														X
	PEP biosynthesis (in cytoplasm)
	LOC100163010	NADP-dependent malic enzyme	1.1.1.40	30572.9	23715.3	17178.7	12216.6	12918.1																								29.5626					-2.60212	X	X
	LOC100165091	NADP-dependent malic enzyme	1.1.1.40	4212.79	3057.76	3512.28	3468.9	3811.64																					-45.7839								-1.1179	X
	LOC100160021	Malate dehydrogenase, cytoplasmic-like	1.1.1.37	848.345	706.318	727.418	1042.27	962.178																													-0.927503
	LOC100163431	Malate dehydrogenase, cytoplasmic-like	1.1.1.37																																		2.24659	X
	LOC100163591	Malate dehydrogenase, cytoplasmic-like	1.1.1.37	160.573	121.071	131.206	165.31	144.624																													-0.746127
	LOC100160700	Phosphoenolpyruvate carboxykinase [GTP]-like*	4.1.1.32	7614.29	6412.58	4527.59	1429.41	13089			-2.41043	4.67426																									3.64071	X
	Ala conversion (in cytoplasm)
	LOC100164899	Alanine aminotransferase 2*	2.6.1.2	4348.32	3661.97	3245.62	2689.82	3063.61																													1.4034	X
	Acetyl-CoA
	LOC100167586	Probable pyruvate dehydrogenase E1 component subunit alpha, mitochondrial	1.2.4.1	19880.3	17422.3	13045.6	12228.3	9142.62																													1.88109
	LOC100164251	Pyruvate dehydrogenase E1 component subunit beta, mitochondrial	1.2.4.1	18154.7	16031.3	11466.4	11283.7	8619.39																													1.97719	X
	LOC100160041	Dihydrolipoyllysine-residue acetyltransferase component of pyruvate dehydrogenase complex, mitochondrial	2.3.1.12	15925.7	13186.8	9218.14	6494.71	6250.53																													1.27468
	Gluconeogenesis -> PRPP
	LOC100159375	Glucose-6-phosphate 1-dehydrogenase	1.1.1.49; 1.1.1.363	12367.4	13517.7	10948.4	4750.58	4353.73			-1.75028											-17.8813															1.94123	X	X
	LOC100165291	6-phosphogluconolactonase	3.1.1.31	4994.05	5404.65	5370.68	5546.39	4734.91																					35.4167								0.793177
	LOC100167791	6-phosphogluconate dehydrogenase, decarboxylating	1.1.1.44; 1.1.1.343	47685.9	41769.6	27175.6	16767.7	17351.2			-1.0171																33.8889		-30.7692								1.48818		X
	LOC100169008	Ribose-5-phosphate isomerase-like	5.3.1.6	3359.28	3306.9	3145.37	2773.58	2943.06																				-26.1905			30.4655						4.02033
	LOC100165332	Ribose-phosphate pyrophosphokinase 1-like	2.7.6.1	19674.6	19412.7	17277.1	12407.1	10318.3																													4.77952	X
	Pyrimiidine metabolism
	Uracil production
	LOC100168402	Inosine triphosphate pyrophosphatase-like	3.6.1.-	973.432	1026.73	965.788	1036.37	825.857																													1.57872
	LOC100159257	5'-nucleotidase	3.1.3.5	3090.85	2356.77	1867.53	1698.8	2339.12																			41.6325											X
	LOC100160663	5'-nucleotidase	3.1.3.5	283.753	80.8561	46.9312	20.5466	25.88	-2.66426																												-10.363
	LOC100161212	5'-nucleotidase	3.1.3.5	3180.91	3154.85	2954.32	1789.08	3120.14																													5.64768	X
	LOC100162698	5'-nucleotidase	3.1.3.5	1615.1	592.409	471.54	126.829	210.239	-2.13196																												-8.21187
	LOC100164432	5'-nucleotidase	3.1.3.5	4872.58	3171.78	2163.68	1138.8	2186.06			-1.34497																										-0.809822
	LOC100165508	5'-nucleotidase	3.1.3.5	2337.23	2477.12	2373.04	2416.54	2372.69																					54.1667								1.57388	X
	LOC100166892	5'-nucleotidase	3.1.3.5	8689.63	8042.91	4646.59	2586.87	4185.06			-1.23012																-41.1486	-39.3154										X
	LOC100169565	5'-nucleotidase	3.1.3.5	2619.61	936.033	800.584	349.123	425.832	-2.19029																												-1.82108
	LOC100569100	5'-nucleotidase	3.1.3.5	#N/A																																	-2.62587	X
	LOC100166871	Uridine phosphorylase 2	2.4.2.3	2534.42	2292.22	1294.78	1364.73	1643.86																													8.16686	X
	LOC100159439	Cytidine deaminase	3.5.4.5	1155.24	1139.22	1093.27	1328.67	1068.29																													2.4707	X
	Uracil salvage
	LOC100165128	Pseudouridine-metabolizing bifunctional protein C1861.05-like	2.7.1.83; 4.2.1.70	343.469	297.057	229.174	200.58	127.275																													1.57022
	LOC100570291	Pseudouridine-5'-phosphate glycosidase / pseudouridine kinase	4.2.1.70; 2.7.1.83	506.053	523.26	336.495	251.924	220.645																													1.45695	X		H&M2011- Signifincant & 2Xfold change	Pathway
	Essential amino acids
	LOC100167587	Branched chain-amino acid transaminase	2.6.1.42	12715.1	13079.4	7043.58	5196.11	8717																													3.35476	X		X	Ile, Val, Leu
	LOC100144899	Got2; Aspartate transaminase; glutamate oxaloacetate transaminase 2*	2.6.1.1	11946.4	12160.1	11933.1	10415.7	7827.72																													2.68857	X		X	Phe, Tyr
	LOC100161812	Aspartate transaminase*	2.6.1.1	#N/A																																					Phe, Tyr
	LOC100163139	Aspartate transaminase*	2.6.1.1	340.136	248.2	151.953	128.136	50.1835																					40.8798								-4.2676				Phe, Tyr
	LOC100165255	Aspartate transaminase*	2.6.1.1	6495.9	5750.78	4239.81	3977.54	2897.6																														X			Phe, Tyr
	LOC100166971	Phenylalanine 4-monooxygenase; PAH	1.14.16.1	14115	14950.1	10029.4	3401.03	7340.72			-2.26454																										4.98535	X		X	Tyr
	LOC100159197	Cystathionine gamma-lyase; CTH	4.4.1.1	7559.78	7732.38	4956.74	3253.07	3456.83																													8.01879			X	Met, Ile
	LOC100159560	Cystathionase-like	4.4.1.1	25823.1	23159.2	11364.3	4352.07	4446.43		-1.53938	-2.28315																														Met
	LOC100168557	Homocysteine S-methyltransferase	2.1.1.10	3895.87	2663.03	1940.22	1867.39	1298.15																													28.9248	X		X	Met
	LOC100159972	Homocysteine S-methyltransferase	2.1.1.10	1164.08	1506.36	1444.38	2023.71	2057.22																													2.86369				Met
	Nonessential amino acids
	LOC100160139	GS2; glutamine synthetase 2	6.3.1.2	84846.4	73819.8	50245.9	20470.3	35467.3			-1.87837																-27.2727										2.09303			X	Gln
	LOC100165282	Glutamate-ammonia; glutamine synthetase	6.3.1.2	18.6739	14.4808	8.88848	1.70065	5.47479																													2.953			X	Gln
	LOC100158883	GltS; GOGAT	1.4.1.14	12469.4	10859.4	8166.49	5381.3	3750.01																		-49.026	29.1505					42.5857					2.31769	X	X	X	Glu
	LOC100168809	Ornithine aminotransferase	2.6.1.13	79225.2	72071	41639.4	27896.3	17862.1																													4.42023	X		X	Glu
	LOC100161005	Pyrroline-5-carboxylate reductase	1.5.1.2	3901.4	3438.23	2061.14	1028.25	4151.93																													-1.08911				Glu
	LOC100165747	1-Pyrroline-5-carboxylate dehydrogenase	1.2.1.88	2972.6	3786.92	5335.81	5087.51	4175.88																													-0.300326	X	X		Glu
	LOC100169613	GDH [NAD(P)+]	1.4.1.3	8025.74	5209.83	5164.95	2912.34	3617.33																													-1.19318	X			Glu
	LOC100165735	Phosphoglycerate dehydrogenase; Phgdp*	1.1.1.95; 1.1.1.399	32790.3	30058.6	21647.4	19297.7	14569.7																													3.06846			X	Ser
	LOC100167268	Phosphoglycerate dehydrogenase; glyoxylate/hydroxypyruvate reductase	1.1.1.79; 1.1.1.81	907.006	861.603	529.71	429.077	440.424																													9.60821	X		X	Ser
	LOC100160394	Phosphoglycerate dehydrogenase; glyoxylate/hydroxypyruvate reductase	1.1.1.79; 1.1.1.81	3336.07	3531.14	3770.23	4535.56	3580.48																													1.05361	X			Ser
	LOC100163589	Phosphoserine transaminase	2.6.1.52	14117.6	13216.1	9165.91	4519.19	5445.9			-1.48061																										3.97595	X		X	Ser
	LOC100158884	Phosphoserine phosphatase*	3.1.3.3	7319.65	6253.99	4381.44	2870.38	2634.51																													4.54845	X		X	Ser
	LOC100144899	Got2; Aspartate transaminase; glutamate oxaloacetate transaminase 2*	2.6.1.1	11946.4	12160.1	11933.1	10415.7	7827.72																													2.68857	X		X	Asp
	LOC100161812	Aspartate transaminase*	2.6.1.1	#N/A																																					Asp
	LOC100163139	Aspartate transaminase*	2.6.1.1	340.136	248.2	151.953	128.136	50.1835																					40.8798								-4.2676				Asp
	LOC100165255	Aspartate transaminase*	2.6.1.1	6495.9	5750.78	4239.81	3977.54	2897.6																														X			Asp
	LOC100160265	Asparagine synthase	6.3.5.4	4738.11	2202.78	1048.41	604.496	14979.6	-1.63555	-1.5249																															Asp
	LOC100161762	Asparagine synthase	6.3.5.4	2301.81	2553.7	2666.2	2031.74	2081.65																							26.3437						-1.2839				Asp
	LOC100164179	Asparaginase	3.5.1.1; 3.1.1.5; 3.1.1.47	18131.5	17687.3	11366.8	3830.7	5278.56			-2.27426																											X		X	Asn
	LOC100158730	Asparaginase	3.5.1.1; 3.4.19.5	1113.14	688.249	359.303	264.587	358.73																													-1.20648				Asn
	LOC100160095	Asparaginase	3.5.1.121	2822.82	2674.44	2673.69	850.068	2027.78			-2.3941						2.29682																					X			Asn
	LOC100167144	Asparaginase	3.5.1.121	892.477	881.967	821.266	359.548	656.893			-1.72958																														Asn
	LOC100164899	Alanine aminotransferase 2*	2.6.1.2	4348.32	3661.97	3245.62	2689.82	3063.61																													1.4034	X			Ala
	LOC100163196	Alanine-glyoxylate aminotransferase 2*	2.6.1.44; 2.6.1.40	2598.93	1738.33	1056.38	524.955	465.762																														X		X	Ala
	LOC100165269	Alanine-glyoxylate aminotransferase	2.6.1.44; 2.6.1.40	1522.05	1342.19	937.962	502.892	1046.5																													1.74521	X		X	Ala
	LOC100161178	L-threonine aldolase 2*	4.1.2.48	5160.79	2858.61	2086.6	1361.5	1509.86	-1.27447					-2.02269																								X		X	Gly
	LOC100159142	Threonine aldolase	4.1.2.48	503.26	622.396	1106.63	692.11	441.183																													-2.33552				Gly
	LOC100164013	Glycine dehydrogenase*	1.4.4.2	19539	15807	9173.72	5870.53	5335.38																													4.33865	X		X	Gly
	LOC100162429	Dihydrolipoyl dehydrogenase*	1.8.1.4	17452	15923.8	13366.6	13235	9769.7																													0.680531				Gly
	Transporter type
	LOC100161811	Sugar transporters; similar to AGAP007667-PA	N/A	7718.39	6701.82	4389.53	1262.28	3813.95			-2.60368						3.13274																				4.33903
	LOC100161021	Sugar transporters; similar to AGAP007484-PA	N/A	3503.58	4286.81	2883.05	1035.23	1246.27			-2.14527																										7.87998
	LOC100160251	Sugar transporters; similar to AGAP007483-PA	N/A	2381.87	1792.06	1398.78	652.3	796.809																													4.60013	X
	LOC100163256	Sugar transporters; similar to AGAP004457-PA	N/A	1070.82	1103.82	677.136	252.647	372.058																														X
	LOC100161549	Sugar transporters; similar to AGAP001236-PA	N/A	767.648	700.014	370.029	278.502	162.904
	LOC100159728	Sugar transporter; similar to CG10960 CG10960-PB	N/A	15322.4	14062.6	11209.7	5596.56	5626.79			-1.458																										4.89518	X
	LOC100169115	Sugar transporter; similar to AGAP007484-PA	N/A	2753.13	3004.23	1742.32	692.532	1095.71			-1.92691																										3.20448
	LOC100167659	Sugar transporter; similar to AGAP001236-PA	N/A	270.325	225.15	131.281	38.0414	114.725																													4.66713	X
	LOC100169458	Sugar transporter	N/A	3137.66	2901.57	1627	727.775	616.254			-1.68835																										7.63124
	LOC100166904	Sugar transporter	N/A	1098.91	1246.32	880.68	686.587	522.704																													4.95158	X
	LOC100168622	Sugar transporter	N/A	1845.15	2025.74	1647.29	997.348	2345.54																													3.24207
	LOC100163428	Sugar transporter	N/A	7405.58	6895.4	4316.94	2025.03	1309.08			-1.58351																										3.17942
	LOC100162563	Sugar transporter	N/A	1458.09	1893.82	1945.78	2370.04	2154.82																													2.97054	X
	LOC100163807	Protein transporter; synaptic vesicle glycoprotein 2; similar to CG14691 CG14691-PA	N/A	3774.73	3428.34	2172.82	2098.06	1729.49																													7.21771
	LOC100162627	Protein transporter; Peptide-acetyl-CoA transporter; similar to SD08430p	N/A	#N/A																																	4.51125	X
	LOC100167419	Protein transporter; Peptide-acetyl-CoA transporter; similar to SD08430p	N/A	1287.48	1255.51	944.182	1054.36	783.018																													8.09893	X
	LOC100163344	Protein transporter; Peptide-acetyl-CoA transporter; similar to conserved hypothetical protein	N/A	1927.2	1417.35	908.204	686.465	1072.32																													6.75918	X
	LOC100159262	Protein transporter; Peptide-acetyl-CoA transporter; similar to CG9706 CG9706-PA	N/A	777.37	732.635	528.68	525.543	468.016																													7.78635
	LOC100159922	Protein transporter; Peptide-acetyl-CoA transporter; similar to CG9706 CG9706-PA	N/A	1221.07	1109.69	638.039	639.039	484.378																													2.93846
	LOC100165404	Protein transporter; Peptide-acetyl-CoA transporter; similar to CG9706 CG9706-PA	N/A	#N/A																																	5.15843	X
	LOC100169490	Protein transporter; Peptide-acetyl-CoA transporter; similar to acetyl-coenzyme A transporter	N/A	756.247	849.201	515.326	445.39	529.807																													7.4951
	LOC100164256	Organic acid transporter; sodium-dependent inorganic; similar to CG15094 CG15094-PA	N/A	1227.49	976.616	640.186	711.444	809.494																													3.39661	X
	LOC100168152	Organic acid transporter; sodium-dependent inorganic; similar to AGAP007732-PA	N/A	2636.5	2904.8	1710.76	1028.39	1612.74																													7.34124
	LOC100162864	Organic acid transporter; sodium-dependent inorganic; similar to AGAP007732-PA	N/A	14168.6	11611.7	5718.64	4166.05	4505.81		-1.45064																			-31.016						29.6212		4.24568	X
	LOC100169257	Organic acid transporter; similar to sodium/solute symporter	N/A	4412.29	4622.79	3129.4	2818.47	2026.66																			34.7403										5.80153	X
	LOC100167082	Organic acid transporter; similar to organic cation transporter, partial	N/A	3986.01	3098.91	2319.18	846.566	839.211			-2.10789																										7.14445
	LOC100166357	Organic acid transporter	N/A	6294.99	5007.36	3830.83	2140.58	1486.25																													7.73191	X
	LOC100164485	Organic acid transporter	N/A	8730.61	5724.2	3517.14	2343.45	3139.94																													4.09801	X
	LOC100169129	Organic acid transporter	N/A	3114.04	3253.58	2250.07	1310.32	2303.56																													3.88904
	LOC100168178	Amino acid transporter; cationic AA transmembrane	N/A	3582.09	3038.22	1667.3	612.701	281.559			-2.10004																										6.63299	X
	LOC100161944	Amino acid transporter; AA transmembrane transporter	N/A	5095.39	5906.72	5655.36	3509.21	3875.75			-1.00433																										2.80605	X
	LOC100159188	Amino acid transporter, cationic AA transmembrane	N/A	3453.38	2800.49	1534.65	439.896	414.181			-2.61072																										4.14233	X
	LOC100164077	Amino acid transporter, cationic AA transmembrane	N/A	4497.59	2868.16	1608.74	762.588	1015.42			-1.56545																										2.88517	X
	LOC100162704	Active transporters;sodium/nucleoside cotransporter; similar to AGAP005989-PA, partial	N/A	5016.1	2767.76	1940.87	878.442	2225.44			-1.66029																										3.86159	X
	LOC100162391	Vha16; V-type proton ATPase 16 kDa proteolipid subunit; active transporters	N/A	49058.7	41571.8	27879.3	12837	16023.4			-1.62349																38.0769					28.1569					2.25996
	LOC100145840	Vha14; vacuolar H[+] ATPase 14kD subunit; active transporters	N/A	#N/A																																	2.38077
	LOC100145841	Vha36; vacuolar ATPase subunit D; active transporters	N/A	15557	13745	9770.81	11982.3	9382.84																													1.84485
	LOC100144888	Active transporters; vacuolar ATP synthase subunit G-like protein	N/A	11975.6	9947.11	6902.07	7861.57	6554.47																													4.1162
	LOC100162682	Active transporters; sulfate transporter; similar to AGAP002331-PA	N/A	1112.64	802.719	419.678	151.184	278.827																														X
	LOC100144904	Active transporters; stunted-like isoform B	N/A	16239.8	14337.3	12526	11742	12713.7																													1.27393
	LOC100167176	Active transporters; solute carrier family 25 member 35, hypothetical protein	N/A	5804.51	5086.33	3041.66	2078.65	1410.16																													5.26622
	LOC100159000	Active transporters; similar to vacuolar ATP synthase subunit G-like protein	N/A	#N/A																																	2.12608
	LOC100161987	VhaAC39; vacuolar H[+]-ATPase C39 subunit; active transporters	N/A	14408.1	11124.3	7815.58	4401.49	5372.81			-1.20428																-55.3938							-28.2887			1.94616		X
	LOC100165717	Active transporters; similar to sulfate transporter, similar to AGAP002331-PA	N/A	1519.85	969.438	626.157	307.189	458.553																													4.33644	X
	LOC100159835	Active transporters; similar to sulfate transporter	N/A	4082.67	3558.62	1449.54	1471.71	1225.78		-1.85221																											3.39267	X
	LOC100164052	Active transporters; similar to sulfate transporter	N/A	3921.18	2171.16	1193.09	405.867	727.785			-2.2548																										2.71749	X
	LOC100159703	Active transporters; similar to sodium/solute symporter	N/A	2620.55	1945.18	1203.87	493.627	672.046			-1.86502																										4.5001
	LOC100159106	Active transporters; similar to potassium/chloride symporter, putative, partial	N/A	4469.28	4208.53	2037.64	628.793	1431.91																													4.35792	X
	LOC100162616	Active transporters; similar to pH-sensitive chloride channel	N/A	1577.63	1869.14	1535.4	1139.85	571.561																													1.31582
	LOC100164171	Active transporters; similar to oligopeptide transporter	N/A	2814.55	2461.81	1532.11	1152.03	949.243																													4.06897	X
	LOC100160517	Active transporters; similar to inwardly rectifying k+ channel	N/A	5061.28	5063.24	3126.26	1631.57	1670.62																													4.88861	X
	LOC100163045	Active transporters; similar to GA14898-PA	N/A	6115.41	6105.47	4447.85	3924.94	3048.48																													2.72288
	LOC100166151	Active transporters; similar to CG9990 CG9990-PA	N/A	2027.15	1802.55	948.455	916.021	1171.51																														X
	LOC100158812	Active transporters; similar to CG6293 CG6293-PA	N/A	955.56	1551.64	1248.55	598.351	572.663			-1.54084																										4.396	X
	LOC100161800	Active transporters; similar to CG3876 CG3876-PA	N/A	1147.61	1325.63	996.27	1214.08	812.318																													3.97436	X
	LOC100160550	Active transporters; similar to CG32580 CG32580-PA	N/A	33361.5	26666	15852.3	15208.6	25025.8																													4.45341	X
	LOC100161355	Active transporters; similar to ATPase	N/A	42654.1	33345.3	23690.4	17069.7	13696.3														-9.4196	8.21099														2.06107	X
	LOC100168499	Active transporters; similar to aquaporin	N/A	8694.96	8230.56	6046.88	6033.75	5352.91												-17.5483																	4.20113	X
	LOC100166886	Active transporters; similar to AGAP011839-PA	N/A	1386.68	1437.29	1711.05	1592.03	1051.95																													4.10225	X
	LOC100162446	Active transporters; similar to AGAP007119-PA	N/A	1492.08	2251.75	3235.7	3268.61	2423.02																				36.675									2.98283
	LOC100162816	Active transporters; similar to AGAP002331-PA	N/A	3256.85	2538.01	1583.85	1047.69	947.452																													2.78004
	LOC100159981	Aralar1; calcium-binding mitochondrial carrier protein Aralar1; active transporters	N/A	4306.64	4820.7	4857.21	4273.05	2960.52																													2.93346
	LOC100159664	Active transporters; similar to 2-oxoglutarate carrier protein	N/A	15738.2	12302.7	6033.33	3226.91	3452.29		-1.4563	-1.31262																31.6292										3.30521	X	X
	LOC100165126	Active transporters; putative vacuolar ATP synthase subunit E; hypothetical protein	N/A	31319.9	24259.8	16878.4	14983.4	13328.5																													2.25619
	LOC100165919	Active transporters; putative vacuolar ATP synthase proteolipid subunit; hypothetical protein	N/A	11152.8	9409.26	6889.33	5252.89	4348.22																													2.39023
	LOC100165727	Active transporters; major facilitator superfamily domain-containing protein 5; similar to predicted protein	N/A	1418.27	1562.97	953.822	1244.22	786.341																							32.4571						2.43254	X	X
	LOC100163312	Active transporters; hypothetical protein	N/A	2079	2046.95	1225.28	1157.33	1408.87																			33.6296										4.23128
	LOC100164284	Active transporters; hypothetical protein	N/A	2572.98	2460.68	1399.21	1103.89	1338.7																													4.13114	X
	LOC100165130	Active transporters; equilibrative nucleoside transporter; similar to AGAP003892-PA	N/A	5457.92	6620.27	8571.9	9215.48	6830.26																				34.8003			37.5205						1.55861	X
	LOC100164565	Active transporters; abc transporter; similar to CG17646 CG17646-PA	N/A	1416.12	1088.74	566.361	178.477	396.881			-2.41399																										1.92055	X
	LOC100166685	ABCG (White) subfamily; similar to abc transporter	N/A	993.757	936.034	929.962	1138.08	1034.4																													1.35933
	LOC100165098	ABCC (CFTR/MRP) subfamily; similar to Multidrug-Resistance like Protein 1 CG6214-PK	N/A	1007.8	823.544	604.708	373.131	284.682																													4.09849	X
	LOC100168114	ABCC (CFTR/MRP) subfamily; similar to ATP-dependent bile acid permease	N/A	953.308	956.846	660.198	455.195	482.828																														X
	LOC100166328	ABCC (CFTR/MRP) subfamily; similar to ATP-dependent bile acid permease	N/A	527.048	568.166	323.195	221.943	161.3																													5.86811	X
	LOC100161113	ABCC (CFTR/MRP) subfamily; similar to ATP-dependent bile acid permease	N/A	2513.04	2826.66	1947.07	1419.48	1306.29																													1.67692	X
	LOC100165493	ABCC (CFTR/MRP) subfamily; similar to ATP-dependent bile acid permease	N/A	#N/A																																	1.7629	X

## Sheet: Devo DEGs and DMGs
			KEY:		MIN	Median	MAX			downregulated	up-regulated		downregulated		up-regulated			downregulated		up-regulated			hypomethylated		hypermethylated			hypomethylated		hypermethylated
				Average Normalized Expression					Diff. Exp. (log2FoldChange)				Diff. Exp. (log2FoldChange)					Diff. Splice					Diff. Meth. (% diff. Meth)				Diff. Meth. (% diff. Meth)
	Pathway (UniProt.org)	Annotation	Gene ID	1st instar	2nd instar	3rd instar	4th instar	YA	1st vs. 2nd	2nd vs. 3rd	3rd vs. 4th	4th vs. YA	1st	2nd	3rd	4th	YA	1st	2nd	3rd	4th	YA	1st vs. 2nd	2nd vs. 3rd	3rd vs. 4th	4th vs. YA	1st	2nd	3rd	4th	YA
	Germline	3-hydroxy-3-methylglutaryl-CoA reductase	LOC100165462	8516.31	5755.97	4059.59	2398.08	3462.15			-1.10512														39.2208
	Hox	abdominal-A	LOC100168447	298.205	387.519	323.524	101.892	269.06			-2.42782
	Hox	Acj6	LOC100160786	32.3769	6.89126	24.6607	156.676	114.932			3.84962
	TGF-B	activin receptor type I, thickveins	LOC100167815	1845.13	2816.17	4477.44	3760.64	3222.99																27.1825	-25.6944
	TGF-B	activin receptor type II, punt	LOC100163334	2963.29	3733	4912.52	5355.62	4925.5																42.6692
	Tumor Surpressor/Oncogenes	adenomatous polyposis coli gene product	LOC100166146	3853.78	2471.33	3623.76	5669.49	6392.23																44.7917	39.5833	-33.3333
	Transporter	AP50	LOC100168951	1889.15	1773.54	2047.87	1058.18	1206.97			-1.38292															37.7805
	Hox	apterous 1; LIM homeobox protein 2/9	LOC100159100	1248.16	1232.02	1323.73	446.75	875.43			-2.27148
	Hox	Araucan	LOC100165521	711.588	1477.64	2014.13	651.628	1234.72			-2.35889
	EGF	argos 1	LOC100163166	336.827	546.148	835.83	338.105	579.49			-1.89392
	EGF	argos 4	LOC100162227	1742.55	1946.47	2046.89	2895.11	2794.7																31.5789
	Wnt/Segmentation	armadillo 2, beta-catenin	LOC100162045	5508.71	7351.23	10031	8957.6	7622.85																29.922
	Tumor Surpressor/Oncogenes	atypical Protein Kinase C	LOC100160542	#N/A																					-42.807
	Notch	auxillin	LOC100164086	1026.46	1039.48	1546.14	1454.44	1180.27																			28.4306
	Wnt	axin	LOC100167569	3809.87	6107.94	9221.31	5798.63	6099.09																44.3144		-27.3684	29.4643
	Germline	belle, PL10	LOC100165411	15525.9	17480	21437.2	15530.6	13264																	45.6746
	Germline	Bicaudal D	LOC100164682	959.239	906.571	1088.04	1876.85	1518.36																	-44.6878	32.0574			-25.6126
	Nuerogenesis	big brain	LOC100169393	326.885	2735.75	3612.4	1581.49	1553.16	4.37894		-1.72855		4.12531												-35.0933	-44.8188
	Pupation	blimp1	LOC100159482	1554.44	1274.11	471.799	339.504	1478.05		-2.05272
	TGF-B	bone morphogenetic protein 3 like	LOC100163030	322.996	1108.46	1023.2	436.998	287.027	2.52379		-1.78017
	Germline	boule	LOC100161424	2973.02	1997.43	1468.89	531.827	882.94																35.1716	-31.2354	38.4095
	Nuerogenesis	Brahma	LOC100163098	14144.3	18550.3	23096.7	26418	23278.4																37.2663	-40.8153	26.087
	TGF-B/Eye Devo/Germline	bunched	LOC100165880	#N/A																					-32.245
	Wnt	C-terminal Binding Protein	LOC100158965	5247.44	6518.03	7160.13	6786.58	5389.36															52.7032			-45.7924	"27.27272727 & 31.5958816"
	DV/Toll	cactus; Cact	LOC100165906	2919.8	2966.56	2644.83	2672.51	3398.14																36.155			39.1346		-30.7706
	Eye Devo	canoe	LOC100169483	4967.4	5800.64	6342.55	3427.32	4517.03			-1.29086										10.4357			42.6705	-42.5532
	Segmentation	capncollar	LOC100168358	1676.66	2061.17	2456.47	1321.77	1763.04			-1.30166															-42.9796
	Nuerogenesis	castor	LOC100161789	1825.59	1934.88	2832.99	749.8	1954.23			-2.7751
	Hox	Cut	LOC100161988	1002.42	561.183	3062.26	3407.01	3511.61		3.549									#?	-19.0089
	Mitosis	Cyclin B3	LOC100162579	465.799	531.967	726.368	882.914	707.935																	37.4576		"28.11454849 & 39.38211382"
	Mitosis	Cyclin E	LOC100159237	1343.2	1128.51	1582.3	1391.79	1007.98																		-43.3673
	Eye Devo	dachshund	LOC100167680	215.257	202.793	1167.91	987.907	1275.58		3.67532
	Hh/Wnt	dally-like 3	LOC100168053	3325.76	3217	2946.98	1587.89	2259.96			-1.29702
	TGF-B	Daughters against dpp 2, SMAD6/7 family, partial	LOC100169367	1759.07	2480.76	2680.34	1277.64	1755.09			-1.55282
	TGF-B	Daughters against dpp, SMAD6/7 family	LOC100169367	1759.07	2480.76	2680.34	1277.64	1755.09			-1.55282
	TGF-B	decapentaplegic 2	LOC100168935	42.8986	299.548	280.44	144.061	129.945	4.03492
	TGF-B	decapentaplegic 3	LOC100168426	30.9223	146.796	229.929	139.481	95.6234																	27.7778
	Hox	deformed	LOC100161376	109.311	376.12	511.916	130.001	206.109			-2.86984
	Notch/Nuerogenesis	Delta	LOC100160703	1121.84	1773.65	3359.03	1454.6	1913.82			-1.75245
	Mitosis	disc proliferation abnormal	LOC100163482	3879.48	6737.55	9620.08	6945.77	4412.55																	25.4545
	Wnt/Segmentation	dishevelled	LOC100166217	1338.19	1267.65	1400.7	1129.69	1249.08																37.5489	-41.0909
	Hh/Segmentation	dispatched	LOC100161127	335.809	492.005	824.468	776.692	847.164																46.1905			"34.71822295 & 50.17857143"
	Mitosis	divergent Protein Phosphatase 1 catalytic subunit	LOC100163362	10943	11610.9	12347.5	6888.77	8330			-1.22483
	Mitosis	divergent Protein Phosphatase 2A regulatory subunit A	LOC100161727	89.9791	50.8414	160.869	533.359	364.42			2.48294													40.5549
	Hh/Wnt	Division abnormally delayed (dally)	LOC100164483	2654.9	2937.23	2334.34	1392.3	2098.95			-1.08681
	DV/Toll	dorsal B	LOC100164092	4081.26	4019.86	3725.04	3928.16	4517.38																	40.3628
	DV	E(spl) region transcript mgamma	LOC100162550	3141.11	3626.03	3639.07	1283.57	2448.99			-2.17901					1.92138
	DV	E(spl) region transcript mgamma 2	LOC100169086	770.261	990.185	1219.64	577.594	1040.97			-1.56637
	Mitosis	E2F transcription factor	LOC100163786	2574.93	4084.31	5789.15	4244.03	3717.63																42.522			"26.04651163 & 48.75816993"
	RTK	E3 ubiquitin-protein ligase CBL	LOC100159071	602.922	546.29	516.772	388.655	450.602																			27.8727
	Pupation	E78, NR1E1	LOC100161053	471.281	325.614	95.4316	250.878	589.823																-26.6667
	EGF/Notch/Wnt	ebi	LOC100168609	2655.36	3613.5	5347.2	5227.71	4099.45																			30.1227
	Nuclear Receptors	EcR, ecdysone receptor	LOC100160393	830.419	902.045	1269.29	1282.51	1529.12																			"29.12165848 & 29.16666667 & 40.80841639"		-36.2176
	Hox/Segmentation	empty spiracles	LOC100165732	1279.16	1477.64	1359.52	524.101	904.171			-1.99555
	Estrogen	ERR, NR3B4	LOC100168575	1774.04	1472.28	1315.18	585.372	899.751			-1.69829													40.5556	-27.7108	-38.2033	"27.42069424 & 29.8206278 & 29.98918659 & 34.88394584 & 44.59459459"
	Hox	Extradenticle	LOC100168368	1014.11	1101.72	1494.37	923.865	1369.09																38.7097
	Cell Adhesion	Fasciclin 1	LOC100166190	2055.69	4292.58	6058.86	5856.39	4650.45																53.3784
	FGF	FGFR2	LOC100163782	1263.29	882.976	934.218	908.051	831.023																		-25.8276
	Notch	fringe	LOC100160830	969.163	849.795	703.214	822.988	939.426																		43
	Wnt	frizzled	LOC100166935	843.496	1098.83	1438.07	1404.44	1400.35																33.6672		-43.3566
	Wnt	frizzled 2	LOC100162853	2037.23	2208.33	2915.92	1799.76	3668.43				1.56044
	Hox/Nuclear Receptors	Ftz-f1, NR5A3	LOC100162562	1922.46	2395.88	1953.07	723.363	1673.93			-2.08012														-25.8065
	DV	glass bottom boat	LOC100159372	693.234	853.993	1417.42	1260.21	903.031																		44.2308			-31.3103
	Segmentation	gooseberry; paired box protein 3/7	LOC100163852	242.179	915.916	1022.63	362.817	422.496	2.72595		-2.16805
	Germline	gustavus	LOC100160060	5372.51	6238.89	7792.95	2991.81	5385.84			-2.00196														39.2208
	Segmentation	Hairy/E(spl)-related	LOC100169375	25.7791	25.4072	388.91	209.156	344.947		5.70082
	Hh/Segmentation/Eye Devo	hedgehog	LOC100165590	559.172	1256.97	1103.62	544.769	706.251			-1.48148
	Hh	hedgehog receptor patched	LOC100158939	1535.76	3175.24	4527.27	3632.84	3480.34					1.83072
	Germline	hephaestus	LOC100162918	2288.05	3158.27	5554.92	3604.47	5649.31																		25.5814
	Hox	Hgtx	LOC100158950	87.3224	464.77	784.263	341.051	295.425	3.44594
	Nuclear Receptors	Hnf4, NR2A4	LOC100168732	2317.62	1765.63	1109.21	523.294	868.884			-1.57559														41.4989
	Segmentation/Hox	homeobox protein engrailed	LOC100161671	143.375	467.86	765.233	386.458	552.862	2.41866														-27.907				-25.2284
	Nuclear Receptors	Hr39, NR5B1	LOC100165397	1679.48	1413.85	1781.92	1733.35	2043.07																31.9043
	Nuclear Receptors	Hr78, NR2D1	LOC100163128	267.009	259.066	234.623	342.101	263.439																	-33.282
	Germline	hu li tai shao	LOC100162643	6429.11	5452.38	5849.6	5659	6212.2																34.6154				37.5466
	Wnt/Segmentation	inscuteable	LOC100168182	493.434	473.07	1274.9	493.364	751.781		2.08379	-1.98471
	EGF	kekkon 1b	LOC100164597	2905.11	3445.88	5179.18	6197.52	4989.77																32.3529	-44.4958	44.3026
	EGF	kekkon 4	LOC100158695	36.8271	410.87	712.364	1062.58	1497.23	4.98178				6.69607
	EGF	kekkon 5	LOC100160075	1176.37	1292.07	1560.74	1989.35	1716.49																37.594		33.8983
	Segmentation/Nuerogenesis	Kruppel	LOC100163283	1629.51	2091.68	1617.4	519.142	626.608			-2.37734
	Hox	ladybird early	LOC100163757	56.9128	88.0572	373.167	250.927	374.255																		28.4091					-26.2814
	Hox	Lag1	LOC100164476	7378.09	7274.75	5326.14	2935.26	3720.13															50.5848			31.1475
	Hox	Lim1	LOC100158984	493.108	608.451	1425.85	1482.26	1939.45		1.79497
	Hox	Lim3	LOC100164426	99.1734	2.55847	244.45	483.022	469.585		9.60543				10.1509
	Hox	Lmxb	LOC100166469	44.4644	20.2026	124.342	122.708	191.43		3.89034
	Wnt	Low density lipoprotein related receptor (LRP), arrow	LOC100163985	2088.67	3066.15	4166.76	1963.11	2088.85			-1.576													46.3415			34.7619		-32.5359
	MAPKK	MAPKK hemipterous	LOC100165019	1469.67	972.858	732.944	641.47	624.385																		42.1639
	TGF-B	Medea 2, SMAD4	LOC100167677	13.7578	11.856	8.61803	2.08197	7.70936																			29.4038
	TGF-B	Medea 4, SMAD4	LOC100162614	816.289	750.309	968.136	711.034	749.185																37.78	-29.8891		31.6358		-30.4337829552422-27.7294686-25.88235294
	Wnt	Mediator subunit 12, Kohtalo	LOC100169614	2423.14	3429.03	4739.76	2687.76	3775.9			-1.19305
	Notch	mind bomb 1	LOC100163203	1239.06	1735.29	2125.97	619.021	1180.76			-2.57891												41.9048	37.9273			"39.01098901 & 41.71568627"
	Hox	mirror	LOC100169212	1261.84	1293.77	1946.91	926.274	1344.04			-1.55743
	TGF-B	Mothers against dpp 2, SMAD	LOC100169512	1080.29	1479.7	1390.15	1618.86	1197.94																	31.4867
	MAPK	nemo like kinase	LOC100162414	3151.41	5152.53	6002.2	4551.71	5606.67															47.0745	38.382
	Nuerogenesis	neuralized	LOC100168154	2084.08	1889.23	2352.95	1348.39	1862.05			-1.16987
	Hox	NK7.1	LOC100167793	498.614	387.259	273.687	81.6006	223.853			-2.53749
	Notch/Nuerogenesis	Notch	LOC100164109	1828.4	4291.38	6813.41	2481.85	4343.75	1.73558		-2.11276												-25.7143				-25.0431
	Hox/Nuerogenesis	nubbin	LOC100164863	979.07	1001.7	1234.84	822.338	632.813															51.8941	39.7418		39.2857
	Nuclear Receptors	Nuclear factor I homolog	LOC100169415	432.277	221.006	89.7972	119.278	586.028				3.40854												-30.2326
	Notch	O-fucosyltransferase 1	LOC100169478	372.725	1125.69	2073.11	2258.69	1285.52		1.29405
	Hox	Onecut	LOC100158731	91.5968	25.895	230.583	489.368	526.255		4.63529
	Hox/Eye Devo	Optix	LOC100159487	91.6608	487.092	534.609	374.668	384.765	3.43416				3.29055												26.7857
	T-Box	Optomotor-blind	LOC100158703	739.785	948.085	1252.37	390.569	789.341			-2.43624
	Germline	ovo	LOC100161874	1507.75	2776.77	2568.12	1386.77	1876.26																44	-40.6102
	Toll	pelle	LOC100169297	1124.1	1064.49	1098.55	1500.56	1421.29															27.907
	Axis	pipsqueak	LOC100159948	636.541	504.232	743.489	538.996	720.291																		47.0238
	Germline	piwi	LOC100167269	4455.72	3637.46	3247.01	3601.8	2995.77																46.7458			39.0837	29.094	"-38.7708333333333 & -28.74576271"
	Hox	proboscipedia	LOC100169134	16.0966	15.0534	137.556	104.053	143.508		4.66097
	Hox	prospero	LOC100160397	344.462	562.733	2430.15	1418.17	1296.82		3.06614	-1.13271
	Tumor Surpressor/Oncogenes	Protein Kinase C 98E	LOC100160881	222.394	199.64	142.288	112.975	121.721																-55.5556		44.3656
	MAPK/Wnt	Protein Phosphatase 2A catalytic subunit	LOC100144917	16195.4	17321.3	21373.9	18336.7	15540.5																41.8367
	Hh	Protein Phosphatase 2A regulatory subunit B (widerborst)	LOC100159278	3723.34	4531.64	5022.08	5955.88	4345.83																40.3938
	Germline	pumilio	LOC100159140	7295.73	9344.29	9261.47	9480.83	9296.94															29.6296	-29.4118	-27.2333		"27.6495726495727 & 27.96143251 & 28.63650167"
	Wnt	Pygopus	LOC100161154	2235.62	3085.79	3892.95	2617.88	2559.2																						25.8322
	Mitosis	Rad21	LOC100167520	3548.65	4542.17	6555.55	3858.07	3978.2			-1.11265												46.8676				36.8932
	JAK/STAT	Ran-Binding Protein 2	LOC100160505	7533.91	9022.61	12657.8	11659.6	8275.28																	-34.662		"34.585881045025 & 36.86559419"	33.7333
	JAK/STAT	Ran-Binding Protein 3	LOC100165668	4558.89	5237.19	6151.4	6625.48	5400.55																	-39.5629
	MAPK/ERK	RAP GTPase Activating Protein	LOC100169138	#N/A																					40.7283
	MAPK/ERK	RAS Associated Protein 1	LOC100166893	2349.04	2497.26	2165.99	4194.93	2871.4			1.36345																29.6221
	Wnt	Receptor Tyrosine Kinase-like Orphan Receptor 2	LOC100159640	633.448	613.122	946.918	1104.45	901.769																47.8974			32.2527				-35.3181
	EGF	Rhomboid 4-a	LOC100162200	903.137	1240.99	2277.25	2733.89	2059.67																40.4728	-36.6667
	EGF	Rhomoboid 5	LOC100162164	1209.6	443.726	379.238	586.528	1213.65	-2.12431																-40.3509				-36.1648		-28.8162
	TGF-B	saxophone	LOC100169150	3057.37	3641.45	4070.48	1283.94	2946.52			-2.40998					2.0552								27.7898		-55.2648	35 & 38.04878049		-27.6515
	Notch	scabrous	LOC100159477	295.124	1250.89	2484.19	1388.77	1581.58	2.96528				3.61542
	Nuclear Receptors	seven up, NR2F1	LOC100164500	1515.82	1591.52	922.154	280.836	563.136			-2.48783
	Eye Devo	sevenless	LOC100162339	1643.52	1721.57	1634.83	2107.57	2008.44															42.2477	36.5646
	Hox	shaven	LOC100159241	88.3706	78.9237	325.375	293.723	440.01		2.97782													-27.2727
	DV/TGFB	short gastrulation, chodrin family	LOC100161569	991.768	1086.99	1065.49	488.61	733.23			-1.63302													53.7449
	Segmentation	sloppy-paired	LOC100164522	154.705	669.834	607.034	146.087	230.055	3.01392		-2.97792
	TGF-B	Smox, SMAD2/3 family	LOC100164536	1079.26	1197.55	1040.73	898.014	852.782																		40.2914
	Eye Devo	Son of sevenless	LOC100159579	680.312	668.394	928.969	586.091	551.76																-32.7869
	Wnt	SoxNeuro	LOC100164548	1736.61	4374.38	3457.48	884.137	1357.74	1.88129		-2.84879
	Toll	spatzle 2	LOC100162252	3275.42	1852.03	627.804	480.836	1008.66		-2.23114
	Germline	spindle E	LOC100166308	4178.32	4670.41	5356.43	5552.39	4264.91																36.2626	-30.12
	Wnt/Segmentation	sprinter, Evenness interrupted, evi	LOC100166090	975.024	1653.21	3409	2339	1673.53																		34.0995
	Notch	strawberry notch	LOC100159469	4209.98	4526.72	6603.38	4833.56	4761.67																50.7143	25.5319		30.1308	27.3996
	Notch	Suppressor of deltex	LOC100159135	2482.53	2524.27	2206.27	2228.66	1729.61															-44.0058				27.759	30.01316367 & 41.6554206
	Notch	suppressor of hairless 2	LOC100168944	911.963	1165.94	1517.2	1660.31	1322.75															43.3771				41.7968
	Transporter	Syntaxin 1A; Syx1a	LOC100164993	2390.85	1867.38	1897.88	2359.45	2813.89															56.2209	34.1846	-26.3158
	Hox/DV	Tailup	LOC100160905	286.435	344.928	845.166	331.83	637.369			-1.95438
	mTor	Target of Rapamycin/	LOC100163481	2268.9	2698.4	3443.2	2702.25	2427.46																	-32.4263	26.7708	"31.49386845 & 34.9929627 & 41.49829441"				-26.1528
	DV	Toll	LOC100158739	956.283	1196.4	783.822	586.029	522.104																			31.5941
	DV/TGFB	tolloid	LOC100165656	7800.83	7485.39	3021.69	737.157	1787.59		-1.86429	-2.94579													30.5651
	Axis	torso-like related	LOC100161937	3180.98	1987.01	1248.78	547.187	529.122			-1.73062
	Nuerogenesis	transcription factor daughterless	LOC100162653	1049.17	1460.87	2169.28	2229	1492.67																40.7407	-47.0986		33.1976
	Germline	Tropomyosin 2	LOC100159612	26058.2	12533.3	2847.36	2390.35	8811.36		-3.05891		2.80126
	Hox/Eye Devo	twin of eyeless	LOC100167378	434.385	997.09	1170.6	433.003	707.646			-2.07931
	Wnt/Hh	twins	LOC100169090	6176.67	6699.27	7567.31	7928.2	6360.41																	-40.1942		28.1154
	DV/TGFB	twist	LOC100160123	123.832	658.989	777.037	306.252	431.671	3.44109		-1.95021
	Hox	ultrabithorax	LOC100160569	389.988	438.376	615.642	267.242	605.933																	29.6186	-29.7222
	Nuclear Receptors	Ultraspiracle, NR2B4; Usp	LOC100164958	388.529	416.036	515.776	373.315	571.068															58.0886	36.7072			" 33.43662535 & 50.74224022"
	Germline	vasa 2, Apvasa2	LOC100159418	3109.84	3325.33	3585.99	4803.48	3903.09																27.0833			29.7965
	Germline	vasa 4, Apvasa4	LOC100167816	1667.01	1910.38	2116.46	2342.84	1881.24																36.2522	30.53	29.4865		26.4163		-25.1814
	Wnt/Segmentation	wingless, Wnt1	LOC100162071	160.063	586.267	566.694	194.14	335.778	2.66154		-2.24245
	Wnt	Wnt11	LOC100164094	17.9986	11.4099	16.5749	16.4756	38.3521																		45.7514
	Wnt	Wnt16	LOC100159117	630.387	644.967	1264.84	2033.01	1733.77																38.4127
	Wnt	Wnt7	LOC100168810	104.833	437.641	1286.35	431.028	736.55	2.9327	2.27117	-2.28759		4.02417
	Wnt	WntA	LOC100159863	96.3476	81.0455	199.117	880.016	672.878			3.0859
	Germline	wunen, Ppap2a	LOC100164616	2297.5	2096.73	2008.32	2354.11	2459.72																			45.5216		-27.585
	EGF	Yan, aop	LOC100167539	3506.35	5136.15	4858.45	1657.4	2562.99			-2.2498														-30		28.4146
	Hox	zinc-finger homeodomain protein 1	LOC100167266	433.985	599.449	973.266	289.388	593.873			-2.53713
		Developmental Genes of Interest that are expressed in Life Stage Transcriptomes, but neither Differentially Expressed nor Differentially Methylated between Life Stage Comparisons.
		abdominal-B	LOC100162565	36.5106	92.553	215.391	100.173	154.41
		antennapedia	LOC100167267	629.569	781.482	1174.83	1209.55	1453.33
		apterous 2; LIM homeobox protein 2/9	LOC100165973	26.5273	5.0667	31.9474	15.8922	35.0076
		argos 3	#N/A	5.63314	0.106179	0.108333	10.143	9.59297
		armadillo 1, beta-catenin	LOC100166193	3420.28	3604.52	5189.73	5285.67	4924.33
		Arrowhead	LOC100166565	30.1262	40.866	106.473	100.692	119.69
		BarH	LOC100167500	111.611	113.65	356.217	207.644	335.025
		bicoid interacting protein 1	LOC100163097	3057.71	4034.96	5170.87	5759.42	4346.96
		Bj1	LOC100163570	6306.34	8535.56	12376.4	9903.74	7754.52
		brain-specific homeobox	LOC100159499	36.7724	10.2331	8.25581	50.2828	70.617
		brainiac	LOC100164641	696.625	672.194	712.814	982.255	747.469
		Brg-1 associated Protein	LOC100164464	2431.55	3036.26	5050.72	5388.56	3728.72
		bride of sevenless	LOC100160726	47.8172	19.1291	13.0162	35.3739	109.651
		Caki	LOC100163433	2907.26	2630.24	2883.16	1777.01	2748.23
		cappuccino	LOC100159471	1850.76	1756.39	1848.86	1557.57	2389.1
		collier	LOC100166884	23.5461	44.5125	115.642	150.499	136.832
		courtless	LOC100159962	2699.66	2592.06	2311.45	2008.35	2439.92
		CREB Binding Protein, nejire	LOC100162127	3293.29	3392.76	4561.53	2851.21	2886.62
		deadpan	LOC100163380	14.1715	13.3509	43.2156	16.1314	18.8458
		decapentaplegic 1	LOC100163532	832.241	672.388	638.554	565.654	593.268
		deltex	LOC100160891	743.578	801.591	1045.86	1037	924.805
		dorsal	LOC100162436	4030.38	4100.97	3202.55	2708.9	2421.24
		downstream of receptor kinase	LOC100169346	2358.72	2629.1	3050.88	2767.16	2698.1
		Dsor1, mitogen-activated protein kinase kinase	LOC100159396	1262.1	1458.48	1745.88	1501.04	1438.21
		Extra extra	LOC100164692	17.4522	3.1211	3.54032	15.2788	14.0135
		exuperantia	LOC100164054	20559	14853.3	10629.6	9137.05	8324.04
		eyegone	LOC100165522	5.99079	3.05143	24.2987	22.842	31.1896
		eyes absent	LOC100167386	458.077	965.285	1409.54	899.618	1068.6
		FGF receptor	LOC100161175	489.105	766.507	1395.78	903.419	1146.87
		fibroblast growth factor 1	LOC100167265	145.582	100.643	107.857	198.648	321.432
		fibroblast growth factor intracellular binding protein	LOC100160306	739.061	676.784	962.732	1341.48	1392.61
		forkhead 59A	LOC100167072	98.8091	157.434	351.415	112.391	173.619
		forkhead 96C	LOC100159855	66.4717	184.594	453.22	331.383	409.977
		fringe connection	LOC100167798	874.184	984.778	1037.92	1395.47	1127.31
		fringe connection 2	LOC100169370	2168.12	1867.46	1942.81	2102.86	2062.84
		fused	LOC100169043	823.299	915.871	1659.34	1591.88	1143.98
		glass	LOC100167865	56.5673	34.7364	84.8251	118.216	221.708
		glial cell missing	LOC100159717	96.3614	63.5632	79.1419	29.2836	57.4439
		Goosecoid	LOC100162381	6.04642	76.4552	82.0887	29.536	27.9339
		Heparan sulfate 3-O sulfotransferase-B	LOC100167476	74.4772	13.4725	8.65444	35.1302	82.3724
		homothorax	LOC100167980	708.148	1171.87	1401.06	741.943	565.611
		Hr38, NR4A1	LOC100162780	744.912	733.341	267.91	100.926	221.612
		Hr4, NR6A2	LOC100167283	1876.81	1857.31	774.782	496.129	831.204
		Hr46, NR1F4	#N/A	1786.21	1498.52	645.766	285.026	507.242
		Hr51, NR2E3, nuclear receptor subfamily 2, group E, member 3	LOC100166752	7.61836	0.940374	4.25325	8.26242	11.5449
		hunchback	Hb	690.569	897.088	775.359	151.997	241.651
		Hyrax, Parafibromin, CDC73	LOC100161249	1323.23	1635.5	2295.03	2525.74	2322.69
		Inhibition of Dvl/Axin Complex	LOC100161743	142.012	114.358	47.6489	10.413	48.1928
		JAK, Janus kinase, hopscotch homolog	LOC100167312	3067.14	3229.83	3150.69	3292.59	2857.7
		kekkon 1a	LOC100167037	65.974	57.9441	85.209	85.8382	117.17
		kekkon 2a	LOC100169361	658.783	387.519	248.528	205.205	503.323
		kekkon 2b	LOC100164679	50.194	35.9342	11.6329	7.73341	40.7016
		kekkon 3	LOC100164134	63.7704	16.1354	13.4521	9.35141	58.208
		klumpfuss	LOC100163683	1115.67	960.779	1737.12	1263.68	1434.86
		lethal (2) giant discs 1	LOC100168313	1801.8	1926.16	2593.05	2445.55	2166.11
		licorne	LOC100164531	2235.67	1694.77	2001.1	1608.99	1745.11
		liquid facets	LOC100161659	4752.46	3457.65	3309.84	2691.95	2807.01
		Lmxa	LOC100165883	92.5459	35.8104	71.2176	169.823	120.137
		lozenge	LOC100166031	32.8895	26.8016	88.6212	105.139	194.237
		mago nashi	Mago	5058.97	7737.76	11219.5	12331.8	8058.04
		MAP kinase basket	LOC100163276	2806.39	2798.55	3812.51	4069.58	3280.14
		MAP kinase rl	LOC100161230	2047.89	1972.94	1961.53	1742.38	1552.86
		Medea 1, SMAD4	LOC100158948	1102.66	1061.44	1435.69	799.592	853.725
		Medea 3, SMAD4	LOC100164543	104.403	94.2524	59.3317	17.2987	28.4428
		mothers against dpp protein 1, SMAD	LOC100167170	135.356	91.1422	146.697	321.969	462.783
		Netrin	LOC100165437	471.485	413.301	777.068	617.196	955.783
		nicastrin	LOC100167489	672.538	841.049	1197.88	1611.4	1210.35
		Notchless	LOC100162647	2659.33	3317.64	3490.46	2417.08	1966.25
		nudel	LOC100168823	987.836	488.763	228.516	74.0563	87.9666
		numb	LOC100161079	1165.66	1111.01	985.459	661.863	839.419
		orb	#N/A	1764	970.245	343.372	218.103	269.74
		p38 MAP kinase	LOC100169493	2467.37	1992.47	1700.17	2138.57	2196.74
		paird; paired box protein 3/7	LOC100161564	74.2205	242.572	272.916	197.149	171.324
		pangolin, TCF	LOC100161896	2041.25	2440.11	2206.27	2025.92	2907.55
		pipe	LOC100167683	295.588	153.192	106.287	155.647	152.265
		polehole	LOC100169206	5060.1	5126.49	6346.63	4676.8	4023.5
		Prop	LOC100169104	48.0775	10.2141	153.367	243.097	300.654
		protease snake	LOC100166365	426.048	277.929	128.188	110.54	181.859
		Protein Kinase A	LOC100159120	1074.55	948.102	1154.34	1757.94	1650.16
		Protein Kinase B, Akt1	LOC100160970	2804.3	3247.83	2770.14	2117.99	2080.38
		Protein Kinase C delta	LOC100160218	841.321	351.794	150.931	217.854	638.841
		Protein Phosphatase 1 catalytic subunit	LOC100164165	4229.31	5370.93	5967.27	5357.27	3939.83
		Protein Phosphatase 2A regulatory subunit A	LOC100161542	11111.3	12211	14852.5	11840.1	10239.1
		Ptx1	LOC100167981	364.161	234.451	191.085	103.431	141.744
		RAS Associated Protein 2	LOC100168751	1712.19	2028.87	2453.6	2553.52	2251.37
		Ras oncogene at 85D	LOC100159403	3241.55	3638.06	4775.39	4474.16	4922.14
		Ret oncogene	LOC100164983	784.599	550.574	267.697	293.729	137.139
		RNA binding protein aret	LOC100160047	1472.53	884.257	509.842	287.085	542.339
		Rtf1	LOC100162144	5299.75	6859.39	8674.57	9313.13	7844.63
		rumi	LOC100161314	1196.45	1281.89	1642.59	1874.22	1774.45
		Rx	LOC100159606	248.046	336.274	328.617	129.676	230.567
		Scarecrow	LOC100159676	165.643	225.884	213.028	250.694	247.077
		Serrate	LOC100162487	630.804	452.097	681.598	692.059	1254.9
		Shox	LOC100159643	38.5106	28.786	33.0503	60.2346	83.5686
		Signal-transducer and activator of transcription 1	LOC100161101	2887.94	2826.6	2633.88	2799.77	2470.66
		Signal-transducer and activator of transcription 2	LOC100164649	83.2075	98.8941	67.7334	64.9716	52.7511
		similar to CG6712	LOC100167521	7169.32	8354.13	7577.94	8465.1	7518.2
		sine oculis	LOC100160072	45.7133	98.2463	99.304	34.056	52.0611
		single-minded	LOC100166361	770.294	1126.97	1355.32	847.321	731.529
		Six4 homebox transcription factor	LOC100169467	21.1212	74.1353	71.5232	8.63022	15.2278
		smoothened	LOC100161478	1150.79	2060.72	2698.54	2404.75	1943.86
		spalt major	LOC100162796	721.377	592.261	474.462	244.539	332.43
		spatzle 1-1	Spz1-1	651.758	872.197	441.573	486.858	474.67
		spatzle 1-2	Spz1-2	1059.9	950.696	855.927	1056.68	724.775
		spatzle 3	Spz3	291.821	404.105	394.051	383.322	657.303
		spatzle 4	Spz4	668.095	423.484	222.575	236.462	447.802
		Star	Star	719.495	733.122	650.935	739.677	723.178
		Stet, Rho2	LOC100159570	605.31	504.376	671.587	372.247	755.256
		suppressor of fused	LOC100167098	940.085	1279.69	2118.98	2500.36	1989.21
		suppressor of hairless 1	LOC100159885	88.7488	111.97	386.298	389.342	353.809
		tailless	LOC100168680	91.3427	432.251	422.387	234.68	178.409
		teashirt	LOC100159043	870.108	1311.43	1659	913.256	1459.72
		torso-like	LOC100168743	1151.92	1086.42	625.886	297.457	895.821
		transforming growth factor, beta receptor I	LOC100164283	2287.46	2657.11	3467.34	4142.87	3657.61
		Unc4	LOC100159095	151.584	83.6695	346.231	339.862	447.967
		vasa 3, Apvasa3	LOC100165779	1437.95	2027.35	3648.87	2546.96	1583.07
		ventral nervous system defective	LOC100166494	1010.42	574.706	537.927	212.959	312.874
		Vvl	LOC100168140	1409.14	1736.97	2118.47	1317.46	1663.92
		Wnt5	LOC100162376	452.241	672.997	1013.66	977.296	1103.93
		Zn finger homeodomain 2	LOC100161293	2358.03	5405.03	4779.68	2098.89	3072.95
		Developmental Genes of Interest that are not expressed in Life Stage Transcriptomes
		Abox	#N/A	#N/A
		activin-beta	#N/A	#N/A
		aph-1	#N/A	#N/A
		argos 2	#N/A	#N/A
		aristaless	#N/A	#N/A
		Bap	#N/A	#N/A
		Bari	#N/A	#N/A
		beta-transducin repeat containing protein, supernumerary limbs, slmb	#N/A	#N/A
		brinker	#N/A	#N/A
		Buttonless	#N/A	#N/A
		C15	#N/A	#N/A
		CG11294	#N/A	#N/A
		crocodile, forkhead box protein	#N/A	#N/A
		cubitus interruptus	#N/A	#N/A
		dally-like 2	#N/A	#N/A
		Dbx	#N/A	#N/A
		decapentaplegic 4	#N/A	#N/A
		distal-less, homeobox protein DLX family	#N/A	#N/A
		divergent GSK-3	#N/A	#N/A
		divergent PKA 2	LOC100163418	#N/A
		divergent PKA 3	LOC100161173	#N/A
		divergent Protein Phosphatase 2A catalytic subunit	LOC100167086	#N/A
		divergent Protein Phosphatase 2A regulatory subunit B	#N/A	#N/A
		domeless 1	#N/A	#N/A
		domeless 2	Dome2	#N/A
		domeless 3	#N/A	#N/A
		domeless 4	#N/A	#N/A
		domeless 5	#N/A	#N/A
		Drgx	#N/A	#N/A
		dsf, NR2E4	#N/A	#N/A
		Dve	#N/A	#N/A
		E75, NR1D3	E75	#N/A
		eagle, NR0A3	#N/A	#N/A
		epidermal growth factor receptor	LOC100168353	#N/A
		ETS-like protein pointed	#N/A	#N/A
		even-skipped	LOC100162399	#N/A
		eyeless	#N/A	#N/A
		FGF8-like	#N/A	#N/A
		ftz	#N/A	#N/A
		Gastrulation-defective	LOC100160118	#N/A
		Glycogen Synthase kinase 3, shaggy	#N/A	#N/A
		Gooseberry neuro	#N/A	#N/A
		groucho	#N/A	#N/A
		H2.0	#N/A	#N/A
		Hbn	#N/A	#N/A
		Hmx	#N/A	#N/A
		homeobox protein caudal	#N/A	#N/A
		homeobox protein Otx	Otd	#N/A
		homeodomain-containing protein Pknox	#N/A	#N/A
		Hr83, NR2E5	#N/A	#N/A
		intermediate neuroblasts defective	#N/A	#N/A
		invected	#N/A	#N/A
		kekkon 6	LOC100166815	#N/A
		Keren	#N/A	#N/A
		knirps-like 1	#N/A	#N/A
		knirps-like 2	#N/A	#N/A
		labial	#N/A	#N/A
		maverick	#N/A	#N/A
		Me31B	#N/A	#N/A
		Medea 5, SMAD4	#N/A	#N/A
		Msx, drop	#N/A	#N/A
		Msxlx	#N/A	#N/A
		myostatin 1	#N/A	#N/A
		myostatin 2	#N/A	#N/A
		nanos-1, Ap-nanos1, Apnanos	#N/A	#N/A
		nanos-2	#N/A	#N/A
		nanos-3	#N/A	#N/A
		nanos-4	#N/A	#N/A
		Not	#N/A	#N/A
		Otp	#N/A	#N/A
		p38-2 MAP kinase	#N/A	#N/A
		par-1	#N/A	#N/A
		Pdm3	#N/A	#N/A
		Phdp	#N/A	#N/A
		Pph13	#N/A	#N/A
		Presenilin	#N/A	#N/A
		Prrx	#N/A	#N/A
		Receptor related to Tyrosine kinase derailed	#N/A	#N/A
		Repo	#N/A	#N/A
		Rhomboid 4-b	#N/A	#N/A
		rough	#N/A	#N/A
		runt	#N/A	#N/A
		scratch	#N/A	#N/A
		sex combs reduced	#N/A	#N/A
		Slouch 1	#N/A	#N/A
		Slouch 2	#N/A	#N/A
		Slouch 3	#N/A	#N/A
		Slouch related, pseudogene 1	#N/A	#N/A
		spatzle 1-3	#N/A	#N/A
		spatzle 1-4	#N/A	#N/A
		spatzle 1-5	#N/A	#N/A
		spatzle 6	Spz6	#N/A
		spatzle-like	#N/A	#N/A
		spire	#N/A	#N/A
		staufen	#N/A	#N/A
		Tgif	#N/A	#N/A
		Tinman	#N/A	#N/A
		torso	#N/A	#N/A
		tudor	#N/A	#N/A
		unplugged	#N/A	#N/A
		vasa 1, Apvasa	Vasa	#N/A
		vestigial	#N/A	#N/A
		Vsx	#N/A	#N/A
		wunen 2	#N/A	#N/A
		zen	#N/A	#N/A
